# Supplementary material for: Salivary Cortisol Reaction Norms in Zoo-Housed Great Apes: Diurnal Slopes and Intercepts as Indicators of Stress Response Quality
Source: MDPI journal article supplement (doi:10.3390/ani12040522), 2022-02-21
Supplement: s1 [file s1]

Supplementary Table S1: Number of salivary cortisol slopes and intercepts per individual.

|           |              |         | Old ape house                   | Enrichment days | New ape house |              |
|-----------|--------------|---------|---------------------------------|-----------------|---------------|--------------|
| Species   | Age category | Sex     | Number of slopes and intercepts |                 |               | Total number |
| Orangutan | Adult        | Male    | 1                               | 10              | 1             | 12           |
|           |              | Female1 | 1                               | 10              | 1             | 12           |
|           |              | Female2 | 1                               | 10              | 1             | 12           |
|           |              | Female3 | 1                               | 10              | 1             | 12           |
|           | Immature     | Male1   | 1                               | 10              | 1             | 12           |
|           |              | Male2   | 1                               | 10              | 1             | 12           |
|           |              | Female  | 1                               | 10              | 1             | 12           |
| Bonobo    | Adult        | Male    | 1                               | 10              | 1             | 12           |
|           |              | Female1 | 1                               | 10              | 1             | 12           |
|           |              | Female2 | 1                               | 10              | 1             | 12           |
|           |              | Female3 | 1                               | 10              | 1             | 12           |
|           |              | Female4 | 1                               | 8               | 1             | 10           |
|           |              | Female5 | 1                               | 10              | 1             | 12           |
|           | Immature     | Female6 | 1                               | 10              | 1             | 12           |
|           |              | Male1   | 1                               | 10              | 1             | 12           |
|           |              | Male2   | 1                               | 10              | 1             | 12           |
|           |              | Male3   | 1                               | -               | 1             | 2            |
|           |              | Female1 | 1                               | 10              | 1             | 12           |
|           |              | Female2 | 1                               | -               | -             | 1            |
| Gorilla   | Adult        | Male    | 1                               | 10              | 1             | 12           |
|           |              | Female1 | 1                               | 10              | 1             | 12           |
|           |              | Female2 | 1                               | 7               | 1             | 9            |
|           |              | Female3 | 1                               | 7               | -             | 8            |
|           |              | Female4 | 1                               | 6               | 1             | 8            |
|           | Immature     | Female5 | 1                               | 9               | 1             | 11           |
|           |              | Male1   | 1                               | 10              | 1             | 12           |
|           |              | Male2   | 1                               | -               | 1             | 2            |
|           |              | Female  | 1                               | 10              | -             | 11           |
|           |              |         |                                 |                 |               | <b>290</b>   |
